# Supplementary material for: Native ambient mass spectrometry of membrane proteins directly from bacterial colonies
Source: Royal Society of Chemistry journal article supplement (doi:10.1039/d4cc03881a), 2025-01-01
Supplement: d4cc03881a1.pdf [file d4cc03881a1.pdf]

## Supporting Information

for

# Native ambient mass spectrometry of membrane proteins directly from bacterial colonies

Yuying Du and Helen J. Cooper

School of Biosciences, University of Birmingham, Edgbaston, Birmingham B15 2TT, UK.

### Contents

#### Experimental methods

**Figure S1. Replicates of protocols based on different washing solvents.**

**Figure S2. Schematic of workflow**

#### Section 1

Table S1: Protein identification with washing protocol 2x(3+1)

Protein identification information of washing protocol 2x(3+1)

#### Section 2

Table S2: Protein identification with washing protocol 3+1

Figure S3. Identification of membrane associated proteins

Protein identification information of washing protocol 3+1

#### References

## **Experimental**

### **Material**

Lysogeny broth (LB) consisting of 5g/L yeast extract (VWR, Lutterworth, UK), 10 g/L peptone (Sigma-Aldrich, Gillingham, UK), and 10 g/L sodium chloride (Fisher Scientific, Loughborough, UK) for culturing the *Escherichia coli* BL21 (DE3) strain was prepared. Lysogeny broth agar (LBA) was prepared by dissolving 20 g/L of pre-mixed LB broth base and 15 g/L of agar (VWR International, Leuven, Belgium) in purified (18 M $\Omega$ ) water, followed by sterilisation by autoclaving at 121°C and 15-16 psig. The stock of *Escherichia coli* BL21 (DE3) overexpressing ZipA was provided by Professor Timothy Dafforn, University of Birmingham, UK. HPLC grade ammonium acetate was purchased from J. T. Baker (Deventer, Netherlands), while the MS-grade water was obtained from Fisher Scientific (Loughborough, UK). The detergent C8E4 was purchased from Sigma-Aldrich (Gillingham, UK).

### **Sample preparation**

Colonies of *Escherichia coli* BL21 (DE3) were raised in 5–10 mL of liquid broth. After incubating at 37 °C overnight, samples were taken by a 5 $\mu$ L inoculating loop which was then inoculated overnight on solid LBA medium in 60 mm diameter Petri dishes.

### **Washing of bacterial colonies**

Twenty  $\mu$ L of the washing solvent (200mM ammonium acetate with 0.5 CMC C8E4) was pipetted onto the colony, ensuring the colony was completely covered. After 30 seconds, the washing solvent was gently aspirated whilst tipping the plate to allow collection of the washing droplet at the edge of the colony. After three rounds of washing with this solvent, a wash with 200mM ammonium acetate was performed. This washing protocol was performed either once or twice, for a total of four (denoted (3+1) herein) or eight (denoted 2x(3+1)) washing steps, as described in the main text.

### **LESA mass spectrometry**

LESA was performed by use of a TriVersa NanoMate (Advion, Ithaca, NY). The TriVersa Nanomate was controlled by the advanced user interface (AUI) feature of the TriVersa NanoMate ChipSoft Manager software 8.3.3. A total of 3  $\mu$ L of the solvent comprising 200 mM ammonium acetate with 2x CMC C8E4 was aspirated from the solvent well and the pipette was brought into contact with the colony surface (contact LEESA[1]). Two  $\mu$ L of solvent was dispensed onto the colony. After maintaining the liquid junction for 3s, the solvent was then aspirated. This dispense/reaspiration cycle was repeated 10 times. The sample was placed into a well in a 96-well plate placed within the TriVersa Nanomate and subsequently transferred to a gold-coated borosilicate nanoelectrospray emitter for introduction into the mass spectrometer.

The Orbitrap Eclipse mass spectrometer (Thermo Fisher Scientific, San Jose) was operated in positive, intact protein mode. For the samples obtained following eight rounds of washing (i.e., the 2x(3+1) washing protocol), the mass spectrometer was operated in ion routing

multipole (IRM) high-pressure mode (20 mTorr) with in-source collision energy of 130 V. Full scan mass spectra were acquired in the range  $m/z$  2000-8000 at a resolving power of 7,500 at  $m/z$  200, with compensation scaling of either 5% and 7%.

For samples obtained following four rounds of washing (i.e., the (3+1) washing protocol), the mass spectrometer was operated in high-pressure mode with an in-source collision energy of 110 V. Mass spectra were acquired at a resolving power of 7,500 at  $m/z$  200, with compensation scaling of either 5% and 7%. To aid desolvation, a two-step wide isolation window was applied ( $m/z$  5000  $\pm$  2000) with 30% normalised collision energy (NCE) HCD applied in the first step and 5% NCE HCD in the second step. For this HCD clean-up, NCE was normalised to 10+ charges.

Protein identification was achieved by HCD MS/MS (with or without prior HCD clean-up). In HCD experiments for proteins <32 kDa, the instrument was operated in standard pressure mode. In all other HCD experiments, the instrument was operated in high pressure mode. Precursor ions were isolated with an isolation window of 15-20 and subjected to HCD between 20%-50% NCE. The fragments were detected in the orbitrap analyser at a resolution of 120,000 at  $m/z$  200 (standard pressure mode) or 7500 at  $m/z$  200 (high pressure mode).

PTCR experiments were performed at a resolution of 7500 at  $m/z$  200 with a reaction time between 2-10ms dependent on each protein.

### **Protein identification.**

Top-down protein identification was achieved by use of ProSightPC software, version 4.1 alpha (Thermo Fisher Scientific, Bremen, Germany). The whole organism proteome database for *Escherichia coli* BL21 (DE3) (UP000002032, 4156 entries) was downloaded in XML format from the UniProt Web site (uniprot.org). The database was structured as a standard top-down database, accounting for initial methionine cleavage, N-terminal acetylation, and N-terminal formylation, while also incorporating single-nucleotide polymorphisms (SNPs) and post-translational modifications (PTMs). The MS/MS spectra raw data were saved using Freestyle (Thermo Fisher Scientific). Deconvolution used the THRASH algorithm [2] within the ProSightPC import profile window, employing default parameters and an S/N ratio ranging from 0.5 to 2, depending on the quality of the acquired MS/MS spectra. Absolute mass search incorporated a delta-mass ( $\Delta m$ ) option to identify potential unknown post-translational modifications and mutations. The search window width was set to 1000 Da with a fragment tolerance of  $\pm 20$  ppm, and a minimum of 2 matching fragments was required. Identified protein sequences were validated using the Sequence Gazer function in ProSightPC software, followed by manual peak assignment. Protein identities were confirmed by manual analysis using Protein Prospector (<http://prospector.ucsf.edu/prospector/mshome.htm>).

no wash

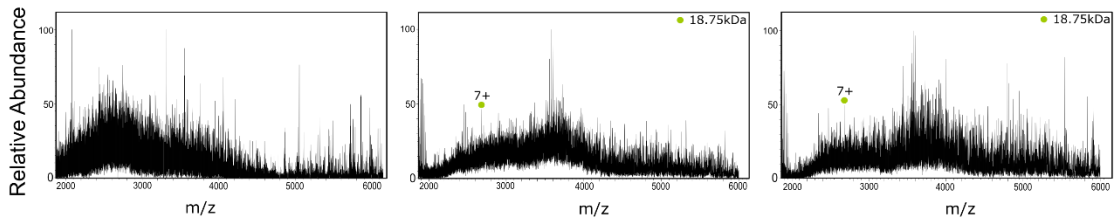

washed by 200 mM ammonium acetate

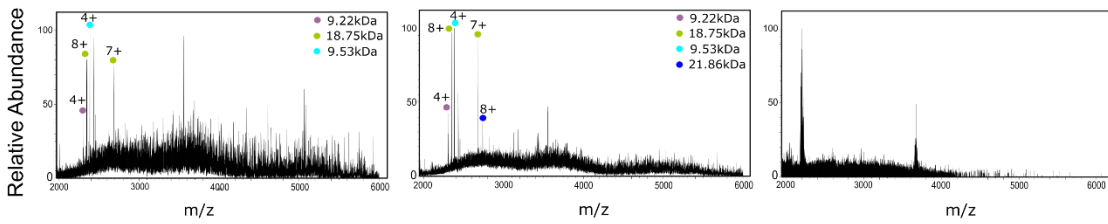

washed by 200 mM ammonium acetate containing 0.5 x CMC C8E4

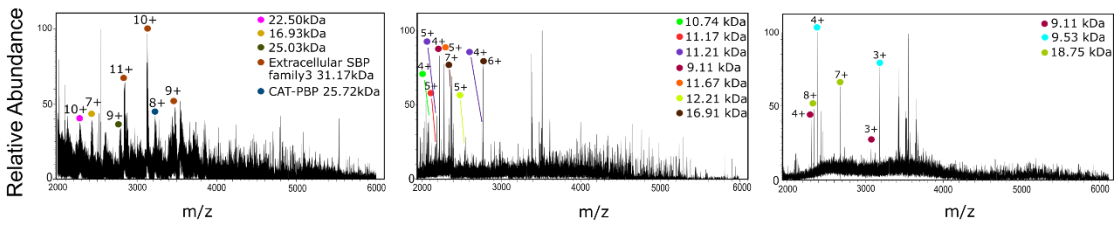

washed by 200 mM ammonium acetate containing 2 x CMC C8E4

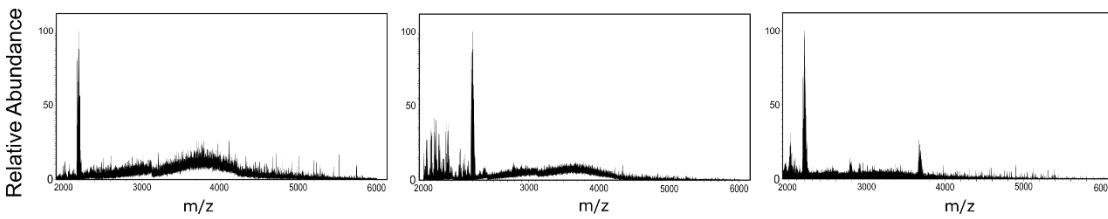

**Figure S1. Optimisation of washing solvent:** LESA mass spectra obtained following washing (single round) of *E. coli* colonies with solvents comprising 200 mM ammonium acetate and various concentrations of C8E4. Experiments were performed in triplicate.

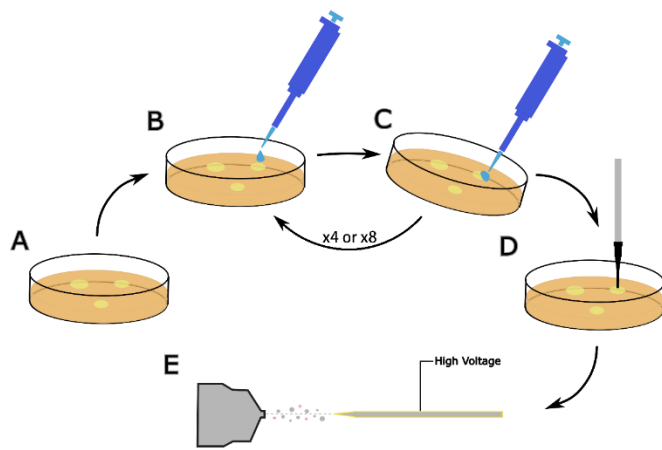

**Figure S2. Schematic of workflow.** **A)** Bacteria were cultured on agar and grew as single colonies. **B)** Washing solvent comprising 200mM ammonium acetate with or without 0.5x CMC C8E4 (0.125% v/v) was deposited on the colony. **C)** The plate was gently tilted and the washing solvent aspirated and sent to waste. **D)** The colony was sampled by LESA. Extraction solvent comprised 200 mM ammonium acetate containing 2x CMC C8E4 (0.5% v/v). **E)** The sample was transferred to a home-made gold coated borosilicate tip and introduced to the mass spectrometer by electrospray ionisation.

---

**Section 1: Identification of proteins detected following washing protocol 2x(3+1)****Table S1: Summary of proteins identified**

| Washing Protocol | Protein                                 | m/z  | Charge state | Protein mass calc (Da) | Protein mass observed (Da) | Mass difference (Da) | Sequence Coverage | Protein Stoichiometry Observed | Protein Type     |
|------------------|-----------------------------------------|------|--------------|------------------------|----------------------------|----------------------|-------------------|--------------------------------|------------------|
| 2x(3+1)          | Long-chain fatty acid transport protein | 5102 | 9+           | 45878.1115             | 45878.0624                 | -0.0491              | 3%                | monomer                        | membrane protein |
| 2x(3+1)          | Outer membrane protein A                | 4397 | 8+           | 35150.5051             | 35148.4338                 | -2.0713              | 2%                | monomer                        | membrane protein |
| 2x(3+1)          | Enolase                                 | 5085 | 18+          | 90990.7780 (dimer)     | 91102.0000(dimer)          | 111.222(dimer)       | 2%                | homodimer                      | soluble protein  |

## Details of protein identification following washing protocol 2x(3+1)

1. Protein name: Long-chain fatty acid transport protein (FADL)

Charge state: +9

Observed monoisotopic mass: 45878.0624 Da

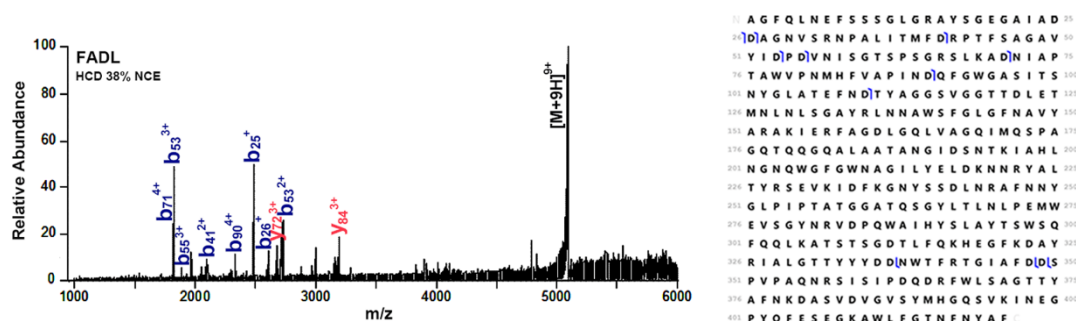

| Name | m/z Monoisotopic | Mass Monoisotopic | Theoretical Mass | Error (Da) | Error (ppm) |
|------|------------------|-------------------|------------------|------------|-------------|
| b25  | 2486.1531        | 2485.1459         | 2485.1509        | -0.0051    | -2.0389     |
| b26  | 2601.1772        | 2600.1700         | 2600.1779        | -0.0079    | -3.0436     |
| b41  | 2094.4803        | 4186.9460         | 4186.9654        | -0.0193    | -4.6131     |
| b53  | 2733.2987        | 5464.5829         | 5464.6058        | -0.0229    | -4.1880     |
| b53  | 1822.5378        | 5464.5917         | 5464.6058        | -0.0141    | -2.5780     |
| b55  | 1893.2233        | 5676.6480         | 5676.6855        | -0.0375    | -6.6000     |
| b71  | 1812.6216        | 7246.4574         | 7246.4965        | -0.0392    | -5.4061     |
| b90  | 2334.6295        | 9334.4890         | 9334.5216        | -0.0326    | -3.4973     |
| b110 | 2874.3621        | 11493.4192        | 11493.4812       | -0.0620    | -5.3949     |
| y72  | 2679.6019        | 8035.7838         | 8035.8281        | -0.0442    | -5.5029     |
| y72  | 4018.9062        | 8035.7979         | 8035.8281        | -0.0302    | -3.7529     |
| y73  | 2717.9450        | 8150.8131         | 8150.8550        | -0.0419    | -5.1404     |
| y73  | 4076.4141        | 8150.8137         | 8150.8550        | -0.0413    | -5.0663     |
| y84  | 3154.1545        | 9459.4417         | 9459.4801        | -0.0384    | -4.0636     |

2. Protein name: Outer membrane protein A (OMPA)

Charge state: +8

Observed monoisotopic mass: 35148.4338 Da

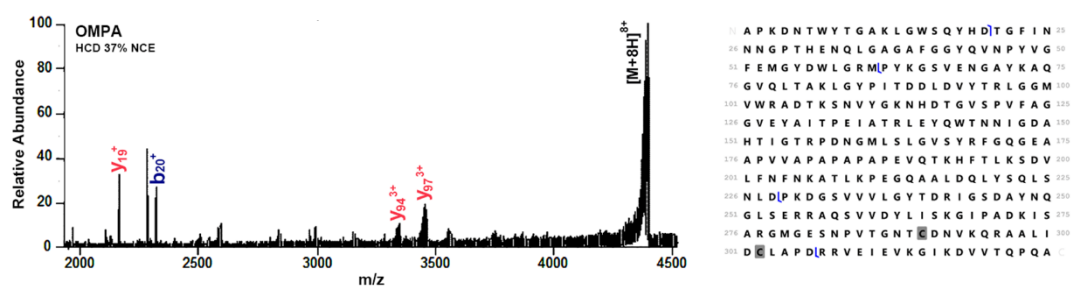

| Name | m/z Monoisotopic | Mass Monoisotopic | Theoretical Mass | Error (Da) | Error (ppm) |
|------|------------------|-------------------|------------------|------------|-------------|
| b20  | 2320.0690        | 2319.0617         | 2319.0709        | -0.0091    | -3.9395     |
| y19  | 2165.2337        | 2164.2265         | 2164.2328        | -0.0063    | -2.9050     |
| y94  | 3347.0385        | 10038.0937        | 10038.1541       | -0.0604    | -6.0182     |
| y97  | 3460.4298        | 10378.2675        | 10378.3287       | -0.0612    | -5.8956     |
| y324 | 4385.6516        | 35077.1547        | 35077.4445       | -0.2898    | -8.2611     |



3. Protein name: Enolase

Charge state: +13, +18

Observed monoisotopic mass: 45551 Da, 91102 Da (Dimer) (with 2 Mg<sup>2+</sup> ions each subunit)

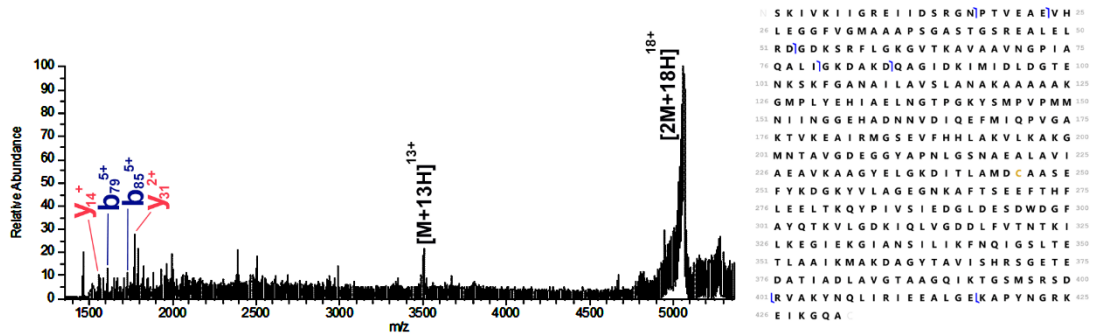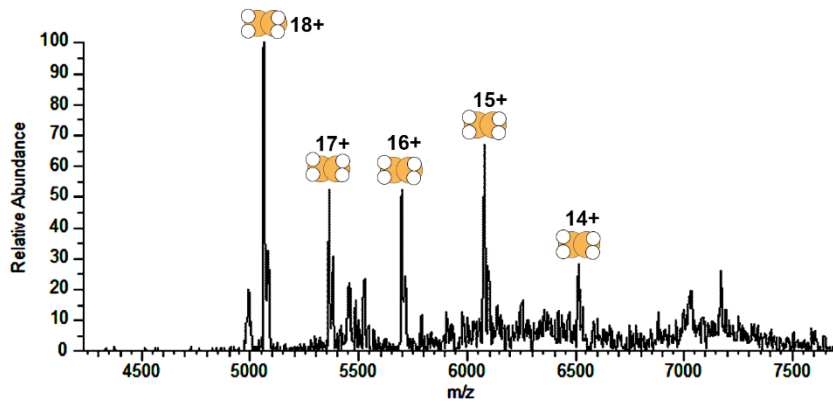

| Name | m/z Monoisotopic | Mass Monoisotopic | Theoretical Mass | Error (Da) | Error (ppm) |
|------|------------------|-------------------|------------------|------------|-------------|
| b17  | 1880.1031        | 1879.0958         | 1879.1003        | -0.0044    | -2.3676     |
| b23  | 2506.3823        | 2505.3750         | 2505.3914        | -0.0164    | -6.5439     |
| b52  | 1791.5983        | 5371.7731         | 5371.7945        | -0.0214    | -3.9910     |
| b79  | 1607.8670        | 8034.2988         | 8034.3227        | -0.0240    | -2.9846     |
| b85  | 1730.7270        | 8648.5984         | 8648.6251        | -0.0267    | -3.0867     |
| y14  | 1559.8651        | 1558.8578         | 1558.8579        | -0.0002    | -0.0988     |
| y31  | 1771.9775        | 3541.9405         | 3541.9481        | -0.0075    | -2.1282     |

## Section 2: Identification of proteins detected following (3+1) washing protocol

**Table S2: Summary of proteins identified**

| Washing Protocol | Protein                                                          | m/z  | Charge state | Protein mass calc (Da) | Protein mass observed (Da) | Mass difference (Da) | Sequence Coverage | Protein Stoichiometry Observed | Protein Type             |
|------------------|------------------------------------------------------------------|------|--------------|------------------------|----------------------------|----------------------|-------------------|--------------------------------|--------------------------|
| 3+1              | Extracellular solute-binding protein family 3                    | 3118 | 10+          | 31152.8914             | 31151.8444                 | -1.0470              | 2%                | monomer                        | membrane related protein |
| 3+1              | Maltodextrin-binding protein                                     | 3700 | 11+          | 40681.9188             | 40681.9611                 | 0.0423               | 1%                | monomer                        | membrane related protein |
| 3+1              | Superoxide dismutase                                             | 3550 | 13+          | 45867.3212(dimer)      | 45996.7417(dimer)          | 129.4202(dimer)      | 4%                | homodimer                      | soluble protein          |
|                  |                                                                  | 2550 | 9+           | 22934.6606(monomer)    | 22934.4470(monomer)        | -0.2136(monomer)     |                   |                                |                          |
| 3+1              | Phosphoenolpyruvate carboxykinase (ATP)                          | 4217 | 14+          | 59606.0146             | 59930.0000                 | 323.9854             | 1%                | monomer                        | soluble protein          |
| 3+1              | Cationic amino acid ABC transporter, periplasmic binding protein | 4298 | 6+           | 25769.0150             | 25783.0000                 | 13.985               | 3%                | monomer                        | membrane related protein |
| 3+1              | Serine hydroxymethyltransferase                                  | 5066 | 18+          | 90577.9624(dimer)      | 91156.0000(dimer)          | 578.0376(dimer)      | 3%                | homodimer                      | soluble protein          |
| 3+1              | 2,3-bisphosphoglycerate-dependent phosphoglycerate mutase        | 4406 | 13+          | 56815.4434(dimer)      | 56843.9280(dimer)          | 28.4846(dimer)       | 2%                | homodimer                      | soluble protein          |
| 3+1              | Long-chain fatty acid transport protein                          | 5102 | 9+           | 45878.1115             | 45878.2669                 | 0.1554               | 1%                | monomer                        | membrane protein         |
| 3+1              | Outer membrane protein A                                         | 4397 | 8+           | 35150.5051             | 35147.4616                 | -3.0435              | 1%                | monomer                        | membrane protein         |

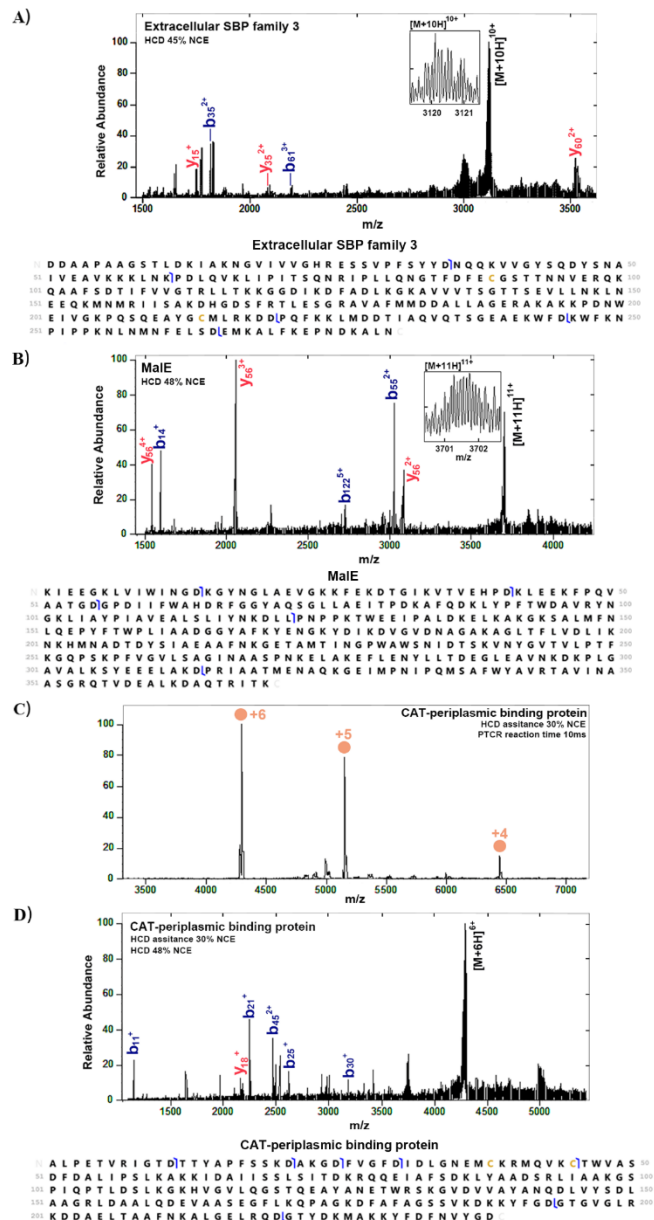

**Figure S3.** Identification of membrane associated proteins. **A)** HCD mass spectrum of 10+ ions (see inset) of extracellular SBP family 3 (m/z 3124±10), NCE 45% and sequence coverage. **B)** HCD mass spectrum of the 11+ ions (see inset) of MalE, NCE 48%, and sequence coverage. **C)** PTMR mass spectrum of and **D)** HCD mass spectrum (49% NCE) of 6+ ions of CAT-periplasmic binding protein precursor and sequence coverage.

## Details of protein identification following washing protocol 3+1

1. Protein name: Extracellular solute-binding protein (SBP) family 3

Charge state: +10

Observed monoisotopic mass: 31151.8444 Da

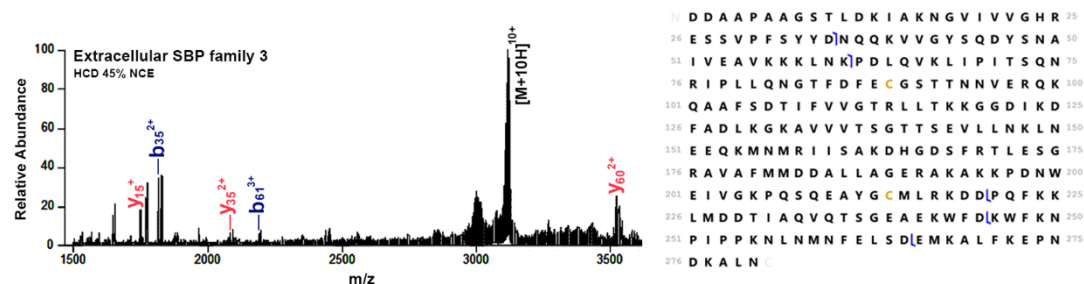

| Name | m/z Monoisotopic | Mass Monoisotopic | Theoretical Mass | Error (Da) | Error (ppm) |
|------|------------------|-------------------|------------------|------------|-------------|
| b35  | 1816.4011        | 3630.7876         | 3630.7954        | -0.0078    | -2.1381     |
| b61  | 2188.7990        | 6563.3752         | 6563.3724        | 0.0028     | 0.4263      |
| b277 | 3084.6594        | 30836.5209        | 30836.7089       | -0.1880    | -6.0979     |
| y15  | 1747.9087        | 1746.9014         | 1746.8974        | 0.0040     | 2.2898      |
| y35  | 2081.0676        | 4160.1207         | 4160.1227        | -0.0020    | -0.4755     |
| y60  | 3527.7643        | 7053.5141         | 7053.5183        | -0.0041    | -0.5848     |

2. Protein name: Maltodextrin-binding protein (MaE)

Charge state: +11

Observed monoisotopic mass: 40681.9611 Da

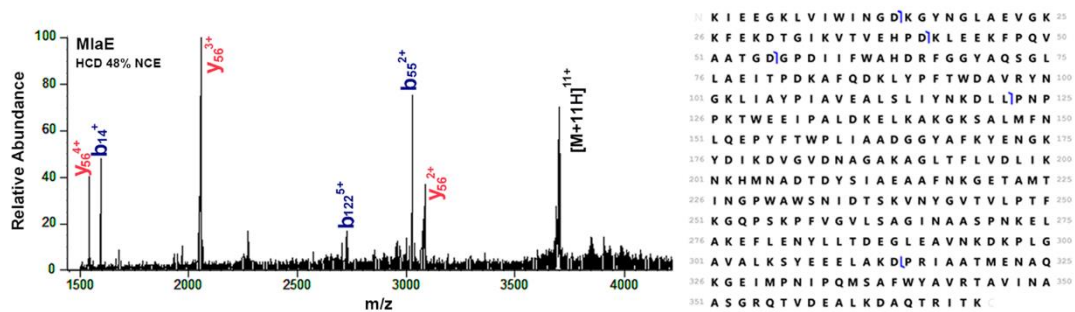

| Name | m/z Monoisotopic | Mass Monoisotopic | Theoretical Mass | Error (Da) | Error (ppm) |
|------|------------------|-------------------|------------------|------------|-------------|
| b14  | 1595.8822        | 1594.8749         | 1594.8719        | 0.0031     | 1.9324      |
| b41  | 2268.7037        | 4535.3928         | 4535.4063        | -0.0135    | -2.9686     |
| b55  | 3025.5832        | 6049.1519         | 6049.1839        | -0.0320    | -5.2918     |
| b122 | 2724.6179        | 13618.0530        | 13618.1119       | -0.0589    | -4.3276     |
| y56  | 1540.5435        | 6158.1447         | 6158.1615        | -0.0168    | -2.7271     |
| y56  | 2053.7234        | 6158.1484         | 6158.1615        | -0.0131    | -2.1251     |
| y56  | 3080.0977        | 6158.1808         | 6158.1615        | 0.0193     | 3.1362      |

3. Protein name: Superoxide dismutase (SOD)

Charge state: +9, +13

Observed monoisotopic mass: 22934.4470(monomer without metal bond)

45996.7417(dimer with 1 Mn<sup>2+</sup> binding each subunit)

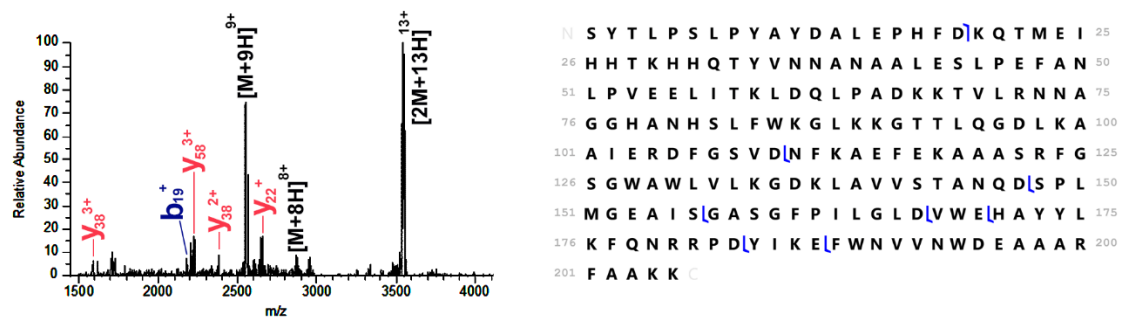

| Name | m/z Monoisotopic | Mass Monoisotopic | Theoretical Mass | Error (Da) | Error (ppm) |
|------|------------------|-------------------|------------------|------------|-------------|
| b19  | 2180.9919        | 2179.9846         | 2180.0102        | -0.0256    | -11.7288    |
| y18  | 2123.0582        | 2122.0510         | 2122.0748        | -0.0238    | -11.2315    |
| y22  | 2656.3486        | 2655.3413         | 2655.3597        | -0.0184    | -6.9456     |
| y35  | 2173.1069        | 4344.1993         | 4344.2133        | -0.0140    | -3.2160     |
| y38  | 1587.1325        | 4758.3756         | 4758.4036        | -0.0279    | -5.8715     |
| y38  | 2380.1962        | 4758.3779         | 4758.4036        | -0.0257    | -5.4022     |
| y49  | 1929.6421        | 5785.9046         | 5785.9374        | -0.0328    | -5.6701     |
| y58  | 2224.7719        | 6671.2940         | 6671.3640        | -0.0700    | -10.4899    |
| y95  | 2667.0856        | 10664.3134        | 10664.4176       | -0.1042    | -9.7716     |

4. Protein name: Phosphoenolpyruvate carboxykinase (ATP)

Charge state: +14

Observed monoisotopic mass: 59930 Da

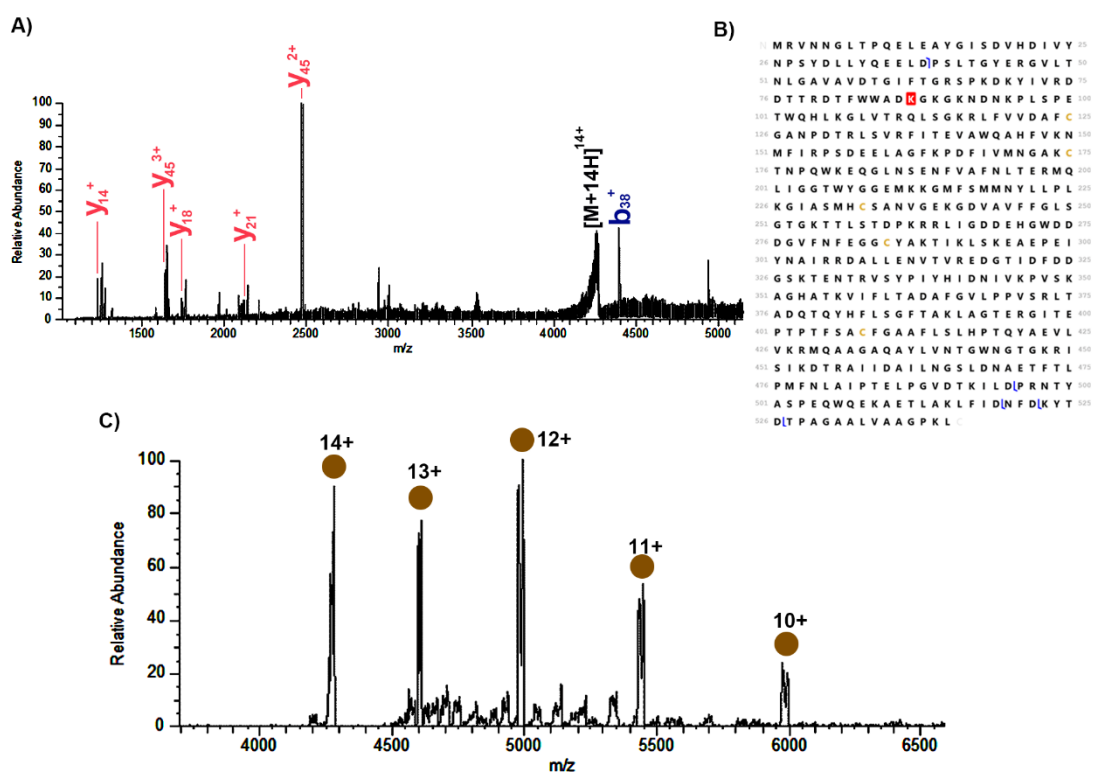

| Name | m/z       | Monoisotopic Mass | Monoisotopic Theoretical Mass | Error (Da) | Error (ppm) |
|------|-----------|-------------------|-------------------------------|------------|-------------|
| b38  | 4395.0618 | 4394.0545         | 4394.0688                     | -0.0143    | -3.2630     |
| y14  | 1236.7274 | 1235.7202         | 1235.7237                     | -0.0036    | -2.8769     |
| y18  | 1743.9605 | 1742.9532         | 1742.9566                     | -0.0034    | -1.9582     |
| y21  | 2120.0904 | 2119.0831         | 2119.0949                     | -0.0118    | -5.5599     |
| y45  | 2468.7459 | 4935.4772         | 4935.5082                     | -0.0310    | -6.2826     |
| y45  | 1646.1678 | 4935.4817         | 4935.5082                     | -0.0265    | -5.3747     |

5. Protein name: Cationic amino acid ABC transporter, periplasmic binding protein

Charge state: +6

Observed monoisotopic mass: 25783 Da

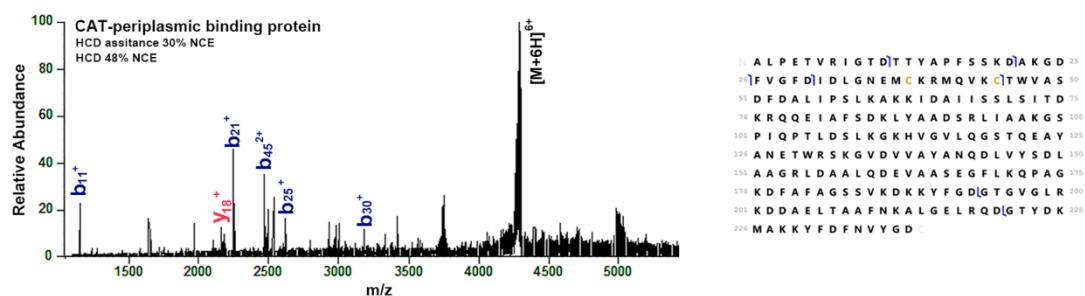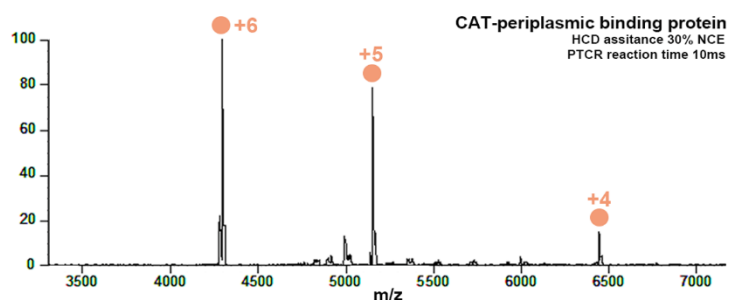

| Name | m/z Monoisotopic | Mass Monoisotopic | Theoretical Mass | Error (Da) | Error (ppm) |
|------|------------------|-------------------|------------------|------------|-------------|
| b11  | 1153.6183        | 1152.6110         | 1152.6139        | -0.0028    | -2.4579     |
| b21  | 2251.1052        | 2250.0979         | 2250.1168        | -0.0189    | -8.3911     |
| b25  | 2622.2887        | 2621.2814         | 2621.2973        | -0.0158    | -6.0340     |
| b30  | 3187.5429        | 3186.5356         | 3186.5509        | -0.0153    | -4.7873     |
| b45  | 2468.7381        | 4935.4616         | 4935.3703        | 0.0913     | 18.4943     |
| y18  | 2161.9747        | 2160.9674         | 2160.9826        | -0.0152    | -7.0213     |
| y45  | 2494.7113        | 4987.4080         | 4987.4450        | -0.0369    | -7.4046     |



6. Protein name: Serine hydroxymethyltransferase

Charge state: +18

Observed monoisotopic mass: 91156 Da (Dimer)

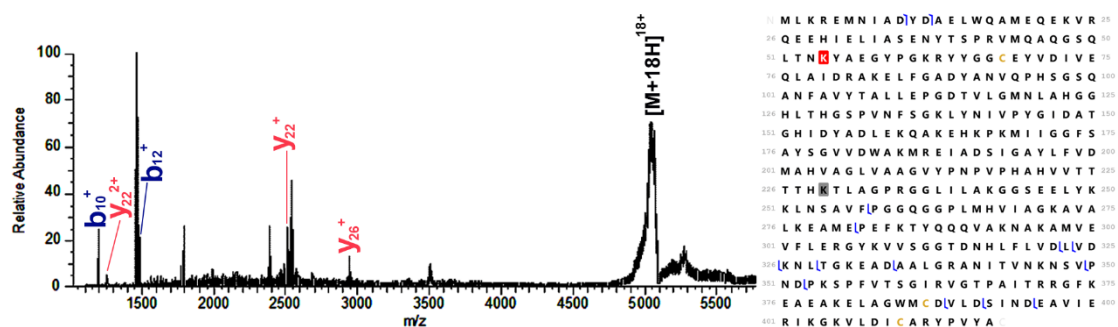

| Name | m/z Monoisotopic | Mass Monoisotopic | Theoretical Mass | Error (Da) | Error (ppm) |
|------|------------------|-------------------|------------------|------------|-------------|
| b10  | 1202.5970        | 1201.5897         | 1201.5947        | -0.0051    | -4.2161     |
| b12  | 1480.6857        | 1479.6784         | 1479.6850        | -0.0066    | -4.4658     |
| y22  | 2506.3729        | 2505.3656         | 2505.3777        | -0.0121    | -4.8152     |
| y22  | 1253.6909        | 2505.3672         | 2505.3777        | -0.0105    | -4.1734     |
| y26  | 2935.5481        | 2934.5408         | 2934.5637        | -0.0229    | -7.7967     |
| y26  | 1468.2780        | 2934.5414         | 2934.5637        | -0.0223    | -7.5923     |
| y29  | 1631.8695        | 3261.7244         | 3261.7431        | -0.0187    | -5.7233     |
| y65  | 1788.1832        | 7148.7036         | 7148.7405        | -0.0369    | -5.1603     |
| y65  | 2383.9086        | 7148.7040         | 7148.7405        | -0.0364    | -5.0971     |
| y68  | 1869.7118        | 7474.8180         | 7474.8631        | -0.0450    | -6.0263     |
| y83  | 2246.9205        | 8983.6529         | 8983.7054        | -0.0525    | -5.8436     |
| y83  | 1797.7381        | 8983.6542         | 8983.7054        | -0.0512    | -5.6976     |
| y89  | 1917.9916        | 9584.9214         | 9584.9761        | -0.0548    | -5.7122     |
| y92  | 2486.0415        | 9940.1369         | 9940.1981        | -0.0612    | -6.1554     |
| y92  | 1989.0371        | 9940.1493         | 9940.1981        | -0.0488    | -4.9105     |
| y94  | 2031.8536        | 10154.2316        | 10154.2934       | -0.0618    | -6.0868     |
| y95  | 2054.4712        | 10267.3195        | 10267.3775       | -0.0579    | -5.6436     |
| y136 | 2485.1177        | 14904.6623        | 14904.7515       | -0.0892    | -5.9854     |
| y160 | 2156.8637        | 17246.8512        | 17246.9753       | -0.1241    | -7.1970     |
| y160 | 2464.8466        | 17246.8751        | 17246.9753       | -0.1002    | -5.8083     |

7. Protein name: 2,3-bisphosphoglycerate-dependent phosphoglycerate mutase

Charge state: +13

Observed monoisotopic mass: 56843.9280 Da (Dimer)

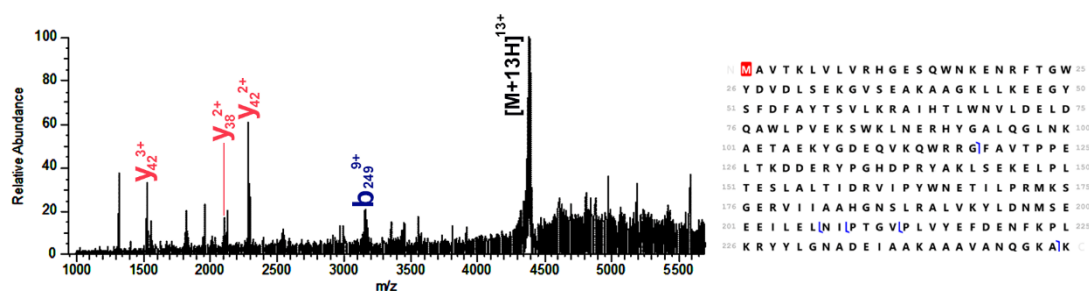

| Name | m/z Monoisotopic | Mass Monoisotopic | Theoretical Mass | Error (Da) | Error (ppm) |
|------|------------------|-------------------|------------------|------------|-------------|
| b118 | 1958.5830        | 13703.0300        | 13702.9921       | 0.0380     | 2.7696      |
| b249 | 3160.3843        | 28434.3935        | 28434.6595       | -0.2659    | -9.3521     |
| y38  | 2107.0962        | 4212.1779         | 4212.2007        | -0.0228    | -5.4126     |
| y42  | 2284.1861        | 4566.3577         | 4566.3910        | -0.0333    | -7.2874     |
| y42  | 1523.1344        | 4566.3814         | 4566.3910        | -0.0096    | -2.1091     |
| y44  | 2397.7550        | 4793.4954         | 4793.5180        | -0.0225    | -4.7030     |

8. Long-chain fatty acid transport protein

Charge state: +9

Observed monoisotopic mass: 45878.2669 Da

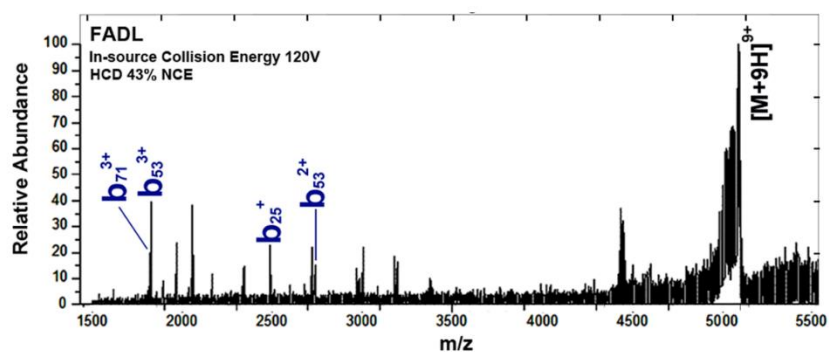

**FADL**

```

75  A G F Q L N E F S S S G L G R A Y S G E G A I A D ] D A G N V S R N P A L I T M F D R P T F S A G A V 50
81  Y I D ] P D V N I S G T S P S G R S L K A D ] N I A P T A W V P N M H F V A P I N D Q F G W G A S I T S 100
101 N Y G L A T E F N D T Y A G G S V G G T T D L E T M N L N L S G A Y R L N N A W S F G L G F N A V Y 150
151 A R A K I E R F A G D L G Q L V A G Q I M Q S P A G Q T Q Q G Q A L A A T A N G I D S N T K I A H L 200
203 N G N Q W G F G W N A G I L Y E L D K N N R Y A L T Y R S E V K I D F K G N Y S S D L N R A F N N Y 250
252 G L P I P T A T G G A T Q S G Y L T L N L P E M W E V S G Y N R V D P Q W A I H Y S L A Y T S W S Q 300
301 F Q Q L K A T S T S G D T L F Q K H E G F K D A Y R I A L G T T Y Y Y D D N W T F R T G I A F D D S 350
351 P V P A Q N R S I S I P D Q D R F W L S A G T T Y A F N K D A S V D V G V S Y M H G Q S V K I N E G 400
401 P Y Q F E S E G K A W L F G T N F N Y A F
    
```

| Name | m/z Monoisotopic | Mass Monoisotopic | Theoretical Mass | Error (Da) | Error (ppm) |
|------|------------------|-------------------|------------------|------------|-------------|
| b25  | 2486.1622        | 2485.1549         | 2485.1509        | 0.0040     | 1.6067      |
| b53  | 2733.3053        | 5464.5960         | 5464.6058        | -0.0098    | -1.7881     |
| b53  | 1822.5443        | 5464.6112         | 5464.6058        | 0.0054     | 0.9949      |
| b71  | 1812.6254        | 7246.4727         | 7246.4965        | -0.0239    | -3.2918     |

9. Outer membrane protein A

Charge state: +8

Observed monoisotopic mass: 35147.4616 Da

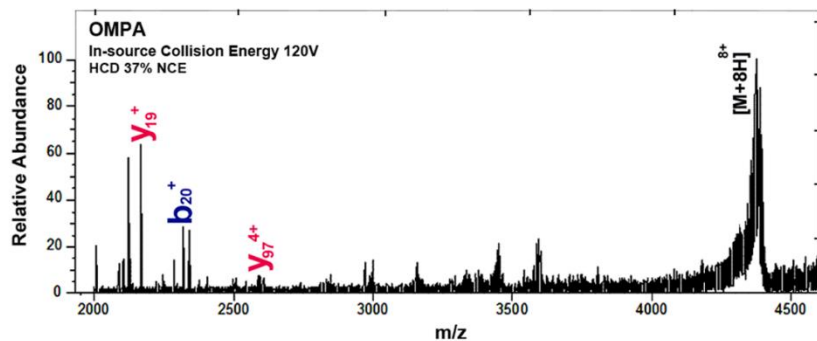

**OMPA**

N A P K D N T W Y T G A K L G W S Q Y H D T G F I N N N G P T H E N Q L G A G A F G G Y Q V N P Y V G 50  
 51 F E M G Y D W L G R M P Y K G S V E N G A Y K A Q G V Q L T A K L G Y P I T D D L D V Y T R L G G M 100  
 101 V W R A D T K S N V Y G K N H D T G V S P V F A G G V E Y A I T P E I A T R L E Y Q W T N N I G D A 150  
 151 H T I G T R P D N G M L S L G V S Y R F G Q G E A A P V V A P A P A P A P E V Q T K H F T L K S D V 200  
 201 L F N F N K A T L K P E G Q A A L D Q L Y S Q L S N L D P K D G S V V V L G Y T D R I G S D A Y N Q 250  
 251 G L S E R R A Q S V V D Y L I S K G I P A D K I S A R G M G E S N P V T G N T D N V K Q R A A L I 300  
 301 D C L A P D R R V E I E V K G I K D V V T Q P Q A

| Name | m/z Monoisotopic | Mass Monoisotopic | Theoretical Mass | Error (Da) | Error (ppm) |
|------|------------------|-------------------|------------------|------------|-------------|
| b20  | 2320.0598        | 2319.0526         | 2319.0709        | -0.0183    | -7.8894     |
| y19  | 2165.2386        | 2164.2313         | 2164.2328        | -0.0015    | -0.6797     |
| y97  | 2595.5707        | 10378.2537        | 10378.3287       | -0.0750    | -7.2298     |
| y264 | 3151.6124        | 28355.4463        | 28355.3784       | 0.0679     | 2.3959      |

## References

- [1] E.C. Randall, J. Bunch, H.J. Cooper, Direct Analysis of Intact Proteins from Escherichia coli Colonies by Liquid Extraction Surface Analysis Mass Spectrometry, *Analytical Chemistry* 86 (2014) 10504-10510.
- [2] D.M. Horn, R.A. Zubarev, F.W. McLafferty, Automated reduction and interpretation of, *Journal of the American Society for Mass Spectrometry* 11 (2000) 320-332.
